# Supplementary material for: Intranasal delivery of pro-resolving lipid mediators rescues memory and gamma oscillation impairment in AppNL-G-F/NL-G-F mice
Source: PubMed Central journal article supplement (PMC8938447; doi:10.1038/s42003-022-03169-3), 2022-03-21
Supplement: 42003_2022_3169_MOESM3_ESM.pdf [file 42003_2022_3169_MOESM3_ESM.pdf]

## Description of Additional Supplementary Files

**File name:** Supplementary Data 1

**Description:** Source data for Figs 1-4, 6, and Supplementary Figs 1-4.
